# Supplementary material for: Synthesis and characterization of functional porous organic polymers as efficient metallocene catalyst supports
Source: Royal Society of Chemistry journal article supplement (doi:10.1039/c6nj01686c), 2016-01-01

**Electronic Supporting Information for *New Journal of Chemistry***

**Synthesis and Characterization of Functional Porous Organic Polymers as  
Efficient Metallocene Catalyst Support**

Xiong Wang,<sup>ab</sup> Renwei Xu,<sup>b</sup> Bochao Zhu,<sup>b</sup> Yanfeng Li<sup>\*a</sup> and Yanping Ma<sup>b</sup>

<sup>a</sup> State Key Laboratory of Applied Organic Chemistry, College of Chemistry and  
Chemical Engineering, Institute of Biochemical Engineering and Environmental  
Technology, Lanzhou University, Lanzhou 730000, China

<sup>b</sup> Lanzhou Petrochemical Research Center, Petrochemical Research Institute,  
PetroChina, Lanzhou 730060, China

Contents :

Table S1. Particle size Distribution data of P(HEMA-co-DVB) particles.

Fig. S1. TGA curves of different P(HEMA-co-DVB) samples.

Fig. S2. Digital camera photos of P(DVB-co-HEMA) particles.

Fig. S3. DFT pore size distribution curves of  $dS(d)$  vs.  $d$  and  $dV(d)$  vs.  $d$  of S4  
sample.

Table S1.

Particle size Distribution data of P(HEMA-co-DVB) particles.

| Sample <sup>Δa</sup> | Dv(10)<br>[μm] | Dv(50)<br>[μm] | Dv(90)<br>[μm] | Mode <sup>Δb</sup><br>[μm] | Span <sup>Δc</sup> |
|----------------------|----------------|----------------|----------------|----------------------------|--------------------|
| S2                   | 8.82           | 52.2           | 149            | 100                        | 2.69               |
| S4                   | 14.5           | 53.1           | 128            | 58.1                       | 2.14               |
| S8                   | 15.7           | 65.2           | 150            | 89.3                       | 2.06               |
| S17                  | 23.6           | 87.4           | 167            | 113                        | 1.64               |
| S18                  | 14.4           | 44.9           | 104            | 55.1                       | 2.00               |
| S19                  | 9.21           | 44.2           | 94.2           | 61.1                       | 1.92               |
| S21                  | 20.9           | 91.1           | 174            | 115                        | 1.68               |
| S15 * <sup>d</sup>   | 17.6           | 141            | 227            | 154                        | 1.49               |

<sup>Δa</sup> Samples were detected in ethanol medium after particles were dispersed and agitated in ethanol solvents for 1h.

<sup>Δb</sup> Mode represents the peak of the particle size distribution; <sup>Δc</sup> Span=[Dv(90)-Dv(10)]/Dv(50). \*<sup>d</sup> Samples were sieved through 50 mesh sieve to remove chunks above 300μm before detected.

Fig. S1. TGA curves of different P(HEMA-co-DVB) samples.

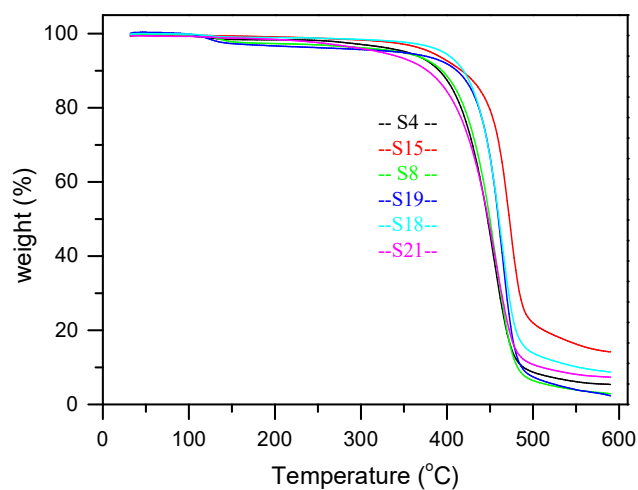

Fig. S2. Digital camera photos of P(DVB-co-HEMA) particles.

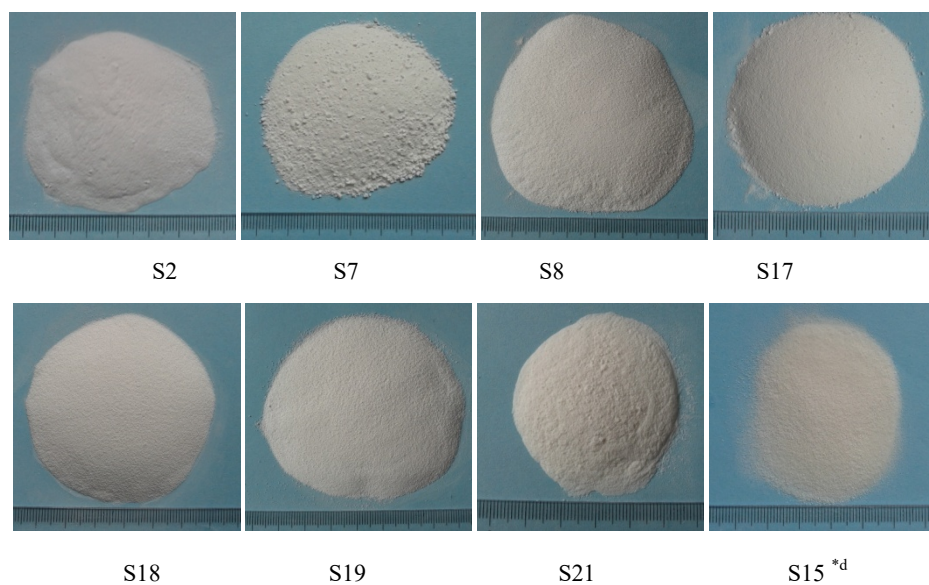

Fig. S3. DFT pore size distribution curves of  $dS(d)$  vs.  $d$  and  $dV(d)$  vs.  $d$  of S4 sample.

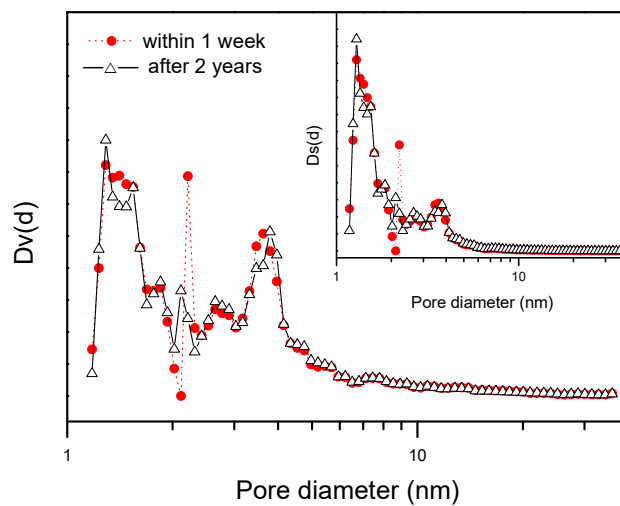

Supplement: c6nj01686c1.pdf [file c6nj01686c1.pdf]
